# Supplementary material for: A Comprehensive Targeted Metabolomics Assay for Crop Plant Sample Analysis
Source: MDPI journal article supplement (doi:10.3390/metabo11050303), 2021-05-11
Supplement: s1 [file s1]

| Supplementary Table S5. Recovery Performance in Spiked NIST® SRM® 1575A Pig Kidney |              |      |
|------------------------------------------------------------------------------------|--------------|------|
| Analyte                                                                            | Recovery (%) |      |
|                                                                                    | Low          | Mid  |
| Creatinine                                                                         | 104          | 101  |
| Glycine                                                                            | 103          | 106  |
| Alanine                                                                            | 109          | 101  |
| Serine                                                                             | 115          | 103  |
| Histamine                                                                          | 108          | 114  |
| Proline                                                                            | 107          | 112  |
| Valine                                                                             | 109          | 106  |
| Threonine                                                                          | 90.2         | 84.5 |
| Phenylethylamine                                                                   | 102          | 109  |
| Taurine                                                                            | 96.4         | 102  |
| Putrescine                                                                         | 105          | 118  |
| trans-Hydroxyproline                                                               | 117          | 108  |
| Leucine                                                                            | 103          | 94.0 |
| Isoleucine                                                                         | 97.5         | 97.3 |
| Asparagine                                                                         | 97.1         | 98.2 |
| Aspartic acid                                                                      | 95.7         | 96.8 |
| Glutamine                                                                          | 108          | 101  |
| Glutamic acid                                                                      | 113          | 107  |
| Methionine                                                                         | 100          | 101  |
| Dopamine                                                                           | 97.9         | 95.8 |
| Histidine                                                                          | 105          | 102  |
| Phenylalanine                                                                      | 101          | 98.1 |
| Arginine                                                                           | 112          | 104  |
| Citrulline                                                                         | 110          | 106  |
| Serotonin                                                                          | 100          | 102  |
| Tyrosine                                                                           | 99.4         | 89.0 |
| DOPA                                                                               | 118          | 108  |
| Asymmetric dimethylarginine                                                        | 109          | 96.4 |
| Total dimethylarginine                                                             | 92.8         | 100  |
| Tryptophan                                                                         | 108          | 106  |
| Kynurenine                                                                         | 105          | 99.0 |
| Carnosine                                                                          | 86.3         | 86.6 |
| Nitro-Tyrosine                                                                     | 91.5         | 88.0 |
| Ornithine                                                                          | 93.8         | 92.0 |
| Lysine                                                                             | 94.8         | 91.9 |
| Spermidine                                                                         | 111          | 112  |
| Spermine                                                                           | 113          | 104  |

|                               |      |      |
|-------------------------------|------|------|
| Sarcosine                     | 104  | 108  |
| Diacetylspermine              | 106  | 94.9 |
| Tyramine                      | 108  | 100  |
| Creatine                      | 105  | 103  |
| Betaine                       | 95.6 | 109  |
| Choline                       | 100  | 114  |
| Trimethylamine N-oxide        | 102  | 102  |
| Methylhistidine               | 101  | 92.7 |
| Proline-Betaine               | 117  | 103  |
| Zeatin                        | 116  | 98.2 |
| Homoserine                    | 98.8 | 98.4 |
| Shikimic acid                 | 103  | 103  |
| Glyceric acid                 | 94.4 | 95.6 |
| beta-Hydroxybutyric acid      | 107  | 106  |
| Lactic acid                   | 105  | 103  |
| HPHPA                         | 104  | 108  |
| Propionic acid                | 119  | 103  |
| 5-Hydroxyindoleacetic acid    | 102  | 114  |
| para-Hydroxyphenylacetic acid | 96.0 | 93.4 |
| Malic acid                    | 113  | 101  |
| Butyric acid                  | 106  | 104  |
| Hippuric acid                 | 103  | 102  |
| Succinic acid                 | 108  | 103  |
| Glutaric acid                 | 104  | 100  |
| Methylmalonic acid            | 110  | 97.5 |
| Fumaric acid                  | 102  | 101  |
| Valeric acid                  | 115  | 94.5 |
| Benzoic acid                  | 103  | 96.7 |
| Oxalic acid                   | 104  | 116  |
| Indole acetic acid            | 100  | 101  |
| Oxaloacetic acid              | 94.3 | 93.3 |
| Salicylic acid                | 114  | 107  |
| Citric acid                   | 111  | 111  |
| Abscisic acid                 | 105  | 92.7 |
| Aconitic acid                 | 94.1 | 96.4 |
| Jasmonic acid                 | 91.7 | 93.8 |
| Pyruvic acid                  | 114  | 101  |
| alpha-Ketoglutaric acid       | 109  | 110  |

| ne Needle Extracts |
|--------------------|
|                    |
|                    |
| High               |
| 102                |
| 110                |
| 107                |
| 102                |
| 103                |
| 103                |
| 107                |
| 92.8               |
| 109                |
| 99.3               |
| 113                |
| 98.0               |
| 90.5               |
| 94.7               |
| 99.1               |
| 90.6               |
| 100                |
| 103                |
| 108                |
| 106                |
| 110                |
| 108                |
| 101                |
| 99.2               |
| 106                |
| 95.9               |
| 108                |
| 102                |
| 101                |
| 105                |
| 96.3               |
| 92.1               |
| 97.9               |
| 100                |
| 101                |
| 114                |
| 116                |

|      |
|------|
| 101  |
| 101  |
| 102  |
| 105  |
| 107  |
| 105  |
| 99.2 |
| 100  |
| 96.5 |
| 94.5 |
| 109  |
| 91.9 |
| 108  |
| 102  |
| 95.0 |
| 104  |
| 102  |
| 110  |
| 98.1 |
| 108  |
| 106  |
| 102  |
| 104  |
| 101  |
| 103  |
| 101  |
| 91.6 |
| 91.1 |
| 106  |
| 98.8 |
| 91.5 |
| 94.2 |
| 110  |
| 96.7 |
| 85.3 |
| 92.1 |
| 90.1 |
| 90.3 |
