# Supplementary material for: A Comprehensive Targeted Metabolomics Assay for Crop Plant Sample Analysis
Source: MDPI journal article supplement (doi:10.3390/metabo11050303), 2021-05-11
Supplement: s1 [file s1]

Supplementary Table 6. Validation Performance of Analytes Analyzed *vi*

| Analyte | Full Name                       | LOD (μM) | Accuracy (%) |
|---------|---------------------------------|----------|--------------|
| C0      | Carnitine                       | 0.222    | 92.6         |
| C2      | Acetylcarnitine                 | 0.135    | 106          |
| C3:1    | Propenoylcarnitine              | 0.0256   | /            |
| C3      | Propionylcarnitine              | 0.0824   | 91.9         |
| C4:1    | Butenylcarnitine                | 0.0240   | /            |
| C4      | Butyrylcarnitine                | 0.0486   | 103          |
| C3OH    | Hydroxypropionylcarnitine       | 0.0337   | /            |
| C5:1    | Tiglylcarnitine                 | 0.0305   | /            |
| C5      | Valerylcarnitine                | 0.0256   | 111          |
| C4OH    | Hydroxybutyrylcarnitine         | 0.0237   | /            |
| C6:1    | Hexenoylcarnitine               | 0.0247   | /            |
| C6      | Hexanoylcarnitine               | 0.0929   | 92.4         |
| C5OH    | Hydroxyvalerylcarnitine         | 0.0341   | /            |
| C5:1DC  | Glutaconylcarnitin              | 0.0250   | /            |
| C5DC    | Glutaryl carnitine              | 0.0191   | /            |
| C8      | Octanoylcarnitine               | 0.0316   | 91.8         |
| C5MDC   | Methylglutaryl carnitine        | 0.0218   | /            |
| C9      | Nonaylcarnitine                 | 0.0110   | /            |
| C7DC    | Pimelylcarnitine                | 0.0200   | /            |
| C10:2   | Decadienylcarnitine             | 0.0490   | /            |
| C10:1   | Decenoylcarnitine               | 0.118    | /            |
| C10     | Decanoylcarnitine               | 0.0585   | 96.7         |
| C12:1   | Dodecenoylcarnitine             | 0.0786   | /            |
| C12     | Dodecanoylcarnitine             | 0.0443   | 107          |
| C14:2   | Tetradecadienylcarnitine        | 0.0519   | /            |
| C14:1   | Tetradecenoylcarnitine          | 0.0716   | /            |
| C14     | Tetradecanoylcarnitine          | 0.0320   | 104          |
| C12DC   | Dodecanedioylcarnitine          | 0.0148   | /            |
| C14:2OH | Hydroxytetradecadienylcarnitine | 0.0542   | /            |
| C14:1OH | Hydroxytetradecenoylcarnitine   | 0.0560   | /            |
| C16:2   | Hexadecadienylcarnitine         | 0.0463   | /            |
| C16:1   | Hexadecenoylcarnitine           | 0.0201   | /            |
| C16     | Hexadecanoylcarnitine           | 0.0265   | 96.5         |
| C16:2OH | Hydroxyhexadecadienylcarnitine  | 0.0368   | /            |
| C16:1OH | Hydroxyhexadecenoylcarnitine    | 0.0491   | /            |
| C16OH   | Hydroxyhexadecanoylcarnitine    | 0.0426   | /            |
| C18:2   | Octadecadienylcarnitine         | 0.0581   | /            |
| C18:1   | Octadecenoylcarnitine           | 0.0411   | /            |
| C18     | Octadecanoylcarnitine           | 0.0237   | 104          |

|                |                                      |         |      |
|----------------|--------------------------------------|---------|------|
| C18:1OH        | Hydroxyoctadecenoylcarnitine         | 0.0568  | /    |
| Hexose         | Hexose                               | 18.5    | 96.3 |
| LysoPC a C14:0 | LysoPhosphatidylcholine acyl C14:0   | 0.194   | /    |
| LysoPC a C16:1 | LysoPhosphatidylcholine acyl C16:1   | 0.0191  | /    |
| LysoPC a C16:0 | LysoPhosphatidylcholine acyl C16:0   | 0.0474  | /    |
| LysoPC a C17:0 | LysoPhosphatidylcholine acyl C17:0   | 0.152   | /    |
| LysoPC a C18:2 | LysoPhosphatidylcholine acyl C18:2   | 0.0258  | /    |
| LysoPC a C18:1 | LysoPhosphatidylcholine acyl C18:1   | 0.0541  | 108  |
| LysoPC a C18:0 | LysoPhosphatidylcholine acyl C18:0   | 0.274   | 105  |
| LysoPC a C20:4 | LysoPhosphatidylcholine acyl C20:4   | 0.0179  | /    |
| LysoPC a C20:3 | LysoPhosphatidylcholine acyl C20:3   | 0.0303  | /    |
| LysoPC a C24:0 | LysoPhosphatidylcholine acyl C24:0   | 0.128   | /    |
| LysoPC a C26:1 | LysoPhosphatidylcholine acyl C26:1   | 0.0320  | /    |
| LysoPC a C26:0 | LysoPhosphatidylcholine acyl C26:0   | 0.0269  | /    |
| LysoPC a C28:1 | LysoPhosphatidylcholine acyl C28:1   | 0.0170  | /    |
| LysoPC a C28:0 | LysoPhosphatidylcholine acyl C28:0   | 0.0765  | /    |
| PC aa C24:0    | Phosphatidylcholine diacyl C24:0     | 0.0214  | /    |
| PC aa C26:0    | Phosphatidylcholine diacyl C26:0     | 0.267   | /    |
| PC aa C28:1    | Phosphatidylcholine diacyl C28:1     | 0.0488  | /    |
| PC ae C30:2    | Phosphatidylcholine diacyl C30:2     | 0.0163  | /    |
| PC ae C30:1    | Phosphatidylcholine diacyl C30:1     | 0.0193  | /    |
| PC ae C30:0    | Phosphatidylcholine diacyl C30:0     | 0.0336  | /    |
| PC aa C30:2    | Phosphatidylcholine diacyl C30:2     | 0.0403  | /    |
| PC aa C30:0    | Phosphatidylcholine diacyl C30:0     | 0.0644  | /    |
| PC ae C32:2    | Phosphatidylcholine acyl-alkyl C32:2 | 0.0139  | /    |
| PC ae C32:1    | Phosphatidylcholine acyl-alkyl C32:1 | 0.0243  | /    |
| PC aa C32:3    | Phosphatidylcholine diacyl C32:3     | 0.00767 | /    |
| PC aa C32:2    | Phosphatidylcholine diacyl C32:2     | 0.0652  | /    |
| PC aa C32:1    | Phosphatidylcholine diacyl C32:1     | 0.108   | /    |
| PC aa C32:0    | Phosphatidylcholine diacyl C32:0     | 0.135   | /    |
| PC ae C34:3    | Phosphatidylcholine acyl-alkyl C34:3 | 0.0513  | /    |
| PC ae C34:2    | Phosphatidylcholine acyl-alkyl C34:2 | 0.0466  | /    |
| PC ae C34:1    | Phosphatidylcholine acyl-alkyl C34:1 | 0.0810  | /    |
| PC ae C34:0    | Phosphatidylcholine acyl-alkyl C34:0 | 0.0229  | /    |
| PC aa C34:4    | Phosphatidylcholine diacyl C34:4     | 0.00953 | /    |
| PC aa C34:3    | Phosphatidylcholine diacyl C34:3     | 0.0847  | /    |
| PC aa C34:2    | Phosphatidylcholine diacyl C34:2     | 0.807   | /    |
| PC aa C34:1    | Phosphatidylcholine diacyl C34:1     | 0.549   | /    |
| PC ae C36:5    | Phosphatidylcholine acyl-alkyl C36:5 | 0.0775  | /    |
| PC ae C36:4    | Phosphatidylcholine acyl-alkyl C36:4 | 0.0780  | /    |
| PC ae C36:3    | Phosphatidylcholine acyl-alkyl C36:3 | 0.0489  | /    |
| PC ae C36:2    | Phosphatidylcholine acyl-alkyl C36:2 | 0.106   | /    |
| PC ae C36:1    | Phosphatidylcholine acyl-alkyl C36:1 | 0.115   | /    |

|             |                                      |         |     |
|-------------|--------------------------------------|---------|-----|
| PC ae C36:0 | Phosphatidylcholine acyl-alkyl C36:0 | 0.0194  | /   |
| PC aa C36:6 | Phosphatidylcholine diacyl C36:6     | 0.156   | /   |
| PC aa C36:5 | Phosphatidylcholine diacyl C36:5     | 0.0910  | /   |
| PC aa C36:4 | Phosphatidylcholine diacyl C36:4     | 0.805   | /   |
| PC aa C36:3 | Phosphatidylcholine diacyl C36:3     | 0.582   | /   |
| PC aa C36:2 | Phosphatidylcholine diacyl C36:2     | 1.18    | /   |
| PC aa C36:1 | Phosphatidylcholine diacyl C36:1     | 0.472   | /   |
| PC aa C36:0 | Phosphatidylcholine diacyl C36:0     | 0.0898  | 104 |
| PC ae C38:6 | Phosphatidylcholine acyl-alkyl C38:6 | 0.0552  | /   |
| PC ae C38:5 | Phosphatidylcholine acyl-alkyl C38:5 | 0.181   | /   |
| PC ae C38:4 | Phosphatidylcholine acyl-alkyl C38:4 | 0.109   | /   |
| PC ae C38:3 | Phosphatidylcholine acyl-alkyl C38:3 | 0.0651  | /   |
| PC ae C38:2 | Phosphatidylcholine acyl-alkyl C38:2 | 0.0653  | /   |
| PC ae C38:1 | Phosphatidylcholine acyl-alkyl C38:1 | 0.0773  | /   |
| PC ae C38:0 | Phosphatidylcholine acyl-alkyl C38:0 | 0.0227  | /   |
| PC aa C38:6 | Phosphatidylcholine diacyl C38:6     | 0.0365  | /   |
| PC aa C38:5 | Phosphatidylcholine diacyl C38:5     | 0.289   | /   |
| PC aa C38:4 | Phosphatidylcholine diacyl C38:4     | 0.362   | /   |
| PC aa C38:3 | Phosphatidylcholine diacyl C38:3     | 0.351   | /   |
| PC aa C38:1 | Phosphatidylcholine diacyl C38:1     | 0.0706  | /   |
| PC aa C38:0 | Phosphatidylcholine diacyl C38:0     | 0.0511  | /   |
| PC ae C40:6 | Phosphatidylcholine acyl-alkyl C40:6 | 0.0686  | /   |
| PC ae C40:5 | Phosphatidylcholine acyl-alkyl C40:5 | 0.0389  | /   |
| PC ae C40:4 | Phosphatidylcholine acyl-alkyl C40:4 | 0.0145  | /   |
| PC ae C40:3 | Phosphatidylcholine acyl-alkyl C40:3 | 0.0197  | /   |
| PC ae C40:2 | Phosphatidylcholine acyl-alkyl C40:2 | 0.0197  | /   |
| PC ae C40:1 | Phosphatidylcholine acyl-alkyl C40:1 | 0.0403  | /   |
| PC aa C40:6 | Phosphatidylcholine diacyl C40:6     | 0.0586  | /   |
| PC aa C40:5 | Phosphatidylcholine diacyl C40:5     | 0.0649  | /   |
| PC aa C40:4 | Phosphatidylcholine diacyl C40:4     | 0.0338  | /   |
| PC aa C40:3 | Phosphatidylcholine diacyl C40:3     | 0.0178  | /   |
| PC aa C40:2 | Phosphatidylcholine diacyl C40:2     | 0.0120  | /   |
| PC aa C40:1 | Phosphatidylcholine diacyl C40:1     | 0.125   | /   |
| PC ae C42:5 | Phosphatidylcholine acyl-alkyl C42:5 | 0.0800  | /   |
| PC ae C42:4 | Phosphatidylcholine acyl-alkyl C42:4 | 0.0108  | /   |
| PC ae C42:3 | Phosphatidylcholine acyl-alkyl C42:3 | 0.0114  | /   |
| PC ae C42:2 | Phosphatidylcholine acyl-alkyl C42:2 | 0.00852 | /   |
| PC ae C42:1 | Phosphatidylcholine acyl-alkyl C42:1 | 0.0148  | /   |
| PC ae C42:0 | Phosphatidylcholine acyl-alkyl C42:0 | 0.0686  | /   |
| PC aa C42:6 | Phosphatidylcholine diacyl C42:6     | 0.0312  | /   |
| PC aa C42:5 | Phosphatidylcholine diacyl C42:5     | 0.00799 | /   |
| PC aa C42:4 | Phosphatidylcholine diacyl C42:4     | 0.00988 | /   |
| PC aa C42:2 | Phosphatidylcholine diacyl C42:2     | 0.00831 | /   |

|             |                                      |         |   |
|-------------|--------------------------------------|---------|---|
| PC aa C42:1 | Phosphatidylcholine diacyl C42:1     | 0.00750 | / |
| PC aa C42:0 | Phosphatidylcholine diacyl C42:0     | 0.0179  | / |
| PC ae C44:6 | Phosphatidylcholine acyl-alkyl C44:6 | 0.0166  | / |
| PC ae C44:5 | Phosphatidylcholine acyl-alkyl C44:5 | 0.0240  | / |
| PC ae C44:4 | Phosphatidylcholine acyl-alkyl C44:4 | 0.00591 | / |
| PC ae C44:3 | Phosphatidylcholine acyl-alkyl C44:3 | 0.00384 | / |



[illegible]

[illegible]

|   |   |
|---|---|
| / | / |
| / | / |
| / | / |
| / | / |
| / | / |
| / | / |
