# Supplementary material for: A Comprehensive Targeted Metabolomics Assay for Crop Plant Sample Analysis
Source: MDPI journal article supplement (doi:10.3390/metabo11050303), 2021-05-11
Supplement: s1 [file s1]

**Supplementary Table S3. Calibration Regression, LOD and LOQ**

| <b>Analyte</b>              | <b>Correlation Coefficient (R<sup>2</sup>)</b> | <b>LOD (µM)</b> |
|-----------------------------|------------------------------------------------|-----------------|
| Creatinine                  | 0.9988                                         | 0.443           |
| Glycine                     | 0.9990                                         | 0.859           |
| Alanine                     | 0.9970                                         | 0.341           |
| Serine                      | 0.9988                                         | 0.0424          |
| Histamine                   | 0.9968                                         | 0.0136          |
| Proline                     | 0.9994                                         | 0.136           |
| Valine                      | 0.9996                                         | 0.161           |
| Threonine                   | 0.9998                                         | 0.185           |
| Phenylethylamine            | 0.9998                                         | 0.00640         |
| Taurine                     | 0.9996                                         | 0.0346          |
| Putrescine                  | 0.9998                                         | 0.00750         |
| trans-Hydroxyproline        | 0.9990                                         | 0.0566          |
| Leucine                     | 0.9996                                         | 0.652           |
| Isoleucine                  | 0.9970                                         | 0.0525          |
| Asparagine                  | 0.9976                                         | 0.482           |
| Aspartic acid               | 0.9980                                         | 0.968           |
| Glutamine                   | 0.9988                                         | 0.266           |
| Glutamic acid               | 0.9994                                         | 0.255           |
| Methionine                  | 0.9976                                         | 0.0291          |
| Dopamine                    | 0.9994                                         | 0.0615          |
| Histidine                   | 0.9986                                         | 0.114           |
| Phenylalanine               | 0.9974                                         | 0.0147          |
| Arginine                    | 0.9982                                         | 0.110           |
| Citrulline                  | 0.9992                                         | 0.750           |
| Serotonin                   | 0.9986                                         | 0.0158          |
| Tyrosine                    | 0.9966                                         | 0.0102          |
| DOPA                        | 0.9990                                         | 0.0719          |
| Asymmetric dimethylarginine | 0.9994                                         | 0.115           |
| Total dimethylarginine      | 0.9998                                         | 0.00898         |
| Tryptophan                  | 0.9988                                         | 0.0599          |
| Kynurenine                  | 0.9954                                         | 0.0164          |
| Carnosine                   | 0.9988                                         | 0.0274          |
| Nitro-Tyrosine              | 0.9974                                         | 0.0346          |
| Ornithine                   | 0.9994                                         | 0.289           |
| Lysine                      | 0.9980                                         | 0.155           |
| Spermidine                  | 0.9992                                         | 0.00954         |
| Spermine                    | 0.9998                                         | 0.0568          |
| Sarcosine                   | 0.9970                                         | 0.167           |
| Diacetylspermine            | 0.9946                                         | 0.0974          |

|                               |        |         |
|-------------------------------|--------|---------|
| Tyramine                      | 0.9994 | 0.0336  |
| Creatine                      | 0.9998 | 0.180   |
| Betaine                       | 0.9986 | 1.23    |
| Choline                       | 0.9992 | 0.294   |
| Trimethylamine N-oxide        | 0.9996 | 0.266   |
| Methylhistidine               | 0.9986 | 0.00708 |
| Proline-Betaine               | 0.9990 | 0.811   |
| Zeatin                        | 0.9950 | 0.543   |
| Homoserine                    | 0.9906 | 0.0223  |
| Shikimic acid                 | 0.9992 | 0.321   |
| Glyceric acid                 | 0.9998 | 0.0395  |
| beta-Hydroxybutyric acid      | 0.9998 | 0.0763  |
| Lactic acid                   | 0.9994 | 0.872   |
| HPHPA                         | 0.9978 | 0.00877 |
| Propionic acid                | 0.9994 | 0.0344  |
| 5-Hydroxyindoleacetic acid    | 0.9968 | 0.0757  |
| para-Hydroxyphenylacetic acid | 0.9978 | 0.0694  |
| Malic acid                    | 0.9998 | 0.0574  |
| Butyric acid                  | 0.9996 | 0.0777  |
| Hippuric acid                 | 0.9998 | 0.0211  |
| Succinic acid                 | 1.0000 | 0.0215  |
| Glutaric acid                 | 0.9998 | 0.0268  |
| Methylmalonic acid            | 0.9986 | 0.0105  |
| Fumaric acid                  | 0.9996 | 0.0303  |
| Valeric acid                  | 0.9998 | 0.0549  |
| Benzoic acid                  | 0.9996 | 0.0141  |
| Oxalic acid                   | 0.9952 | 0.104   |
| Indole acetic acid            | 0.9952 | 0.0171  |
| Oxaloacetic acid              | 0.9978 | 0.0846  |
| Salicylic acid                | 0.9992 | 0.0571  |
| Citric acid                   | 0.9998 | 0.177   |
| Absciscic acid                | 0.9986 | 0.0394  |
| Aconitic acid                 | 0.9990 | 0.0291  |
| Jasmonic acid                 | 0.9996 | 0.0897  |
| Pyruvic acid                  | 0.9920 | 0.0875  |
| alpha-Ketoglutaric acid       | 0.9960 | 0.0248  |

|          |
|----------|
|          |
| LOQ (μM) |
| 1.48     |
| 2.86     |
| 1.13     |
| 0.141    |
| 0.0454   |
| 0.453    |
| 0.537    |
| 0.617    |
| 0.0213   |
| 0.115    |
| 0.0250   |
| 0.189    |
| 2.17     |
| 0.175    |
| 1.61     |
| 3.23     |
| 0.886    |
| 0.851    |
| 0.0969   |
| 0.205    |
| 0.378    |
| 0.0489   |
| 0.366    |
| 2.50     |
| 0.0526   |
| 0.0340   |
| 0.240    |
| 0.385    |
| 0.0299   |
| 0.200    |
| 0.0548   |
| 0.0914   |
| 0.115    |
| 0.963    |
| 0.516    |
| 0.0318   |
| 0.189    |
| 0.556    |
| 0.325    |

|        |
|--------|
| 0.112  |
| 0.601  |
| 4.10   |
| 0.980  |
| 0.886  |
| 0.0236 |
| 2.70   |
| 1.81   |
| 0.0743 |
| 1.07   |
| 0.132  |
| 0.254  |
| 2.91   |
| 0.0292 |
| 0.115  |
| 0.252  |
| 0.231  |
| 0.191  |
| 0.259  |
| 0.0703 |
| 0.0717 |
| 0.0893 |
| 0.0350 |
| 0.101  |
| 0.183  |
| 0.0470 |
| 0.347  |
| 0.0570 |
| 0.282  |
| 0.190  |
| 0.590  |
| 0.131  |
| 0.0970 |
| 0.299  |
| 0.292  |
| 0.0827 |
