# Supplementary material for: A Comprehensive Targeted Metabolomics Assay for Crop Plant Sample Analysis
Source: MDPI journal article supplement (doi:10.3390/metabo11050303), 2021-05-11
Supplement: s1 [file s1]

| Supplementary Table S7. Detected |                              |
|----------------------------------|------------------------------|
| Analyte                          |                              |
|                                  | NIST® SRM® 1575a pine needle |
| Creatinine                       | *ND                          |
| Glycine                          | 0.409 ± 0.00150              |
| Alanine                          | 0.569 ± 0.0165               |
| Serine                           | 0.885 ± 0.00900              |
| Histamine                        | ND                           |
| Proline                          | 0.591 ± 0.00301              |
| Valine                           | 0.224 ± 0.00345              |
| Threonine                        | 0.426 ± 0.00300              |
| Phenylethylamine                 | 0.00288 ± 0.000675           |
| Taurine                          | ND                           |
| Putrescine                       | 0.191 ± 0.00330              |
| trans-Hydroxyproline             | 0.0132 ± 0.000449            |
| Leucine                          | 0.258 ± 0.00645              |
| Isoleucine                       | 0.0353 ± 0.000751            |
| Asparagine                       | 0.259 ± 0.0123               |
| Aspartic acid                    | 2.34 ± 0.0375                |
| Glutamine                        | 8.71 ± 0.0300                |
| Glutamic acid                    | 4.08 ± 0.0601                |
| Methionine                       | 0.0347 ± 0.000149            |
| Dopamine                         | 0.0624 ± 0.00181             |
| Histidine                        | 0.365 ± 0.00749              |
| Phenylalanine                    | 0.148 ± 0.000298             |
| Arginine                         | 52.1 ± 0.751                 |
| Citrulline                       | ND                           |
| Serotonin                        | ND                           |
| Tyrosine                         | 0.0426 ± 0.000897            |
| DOPA                             | ND                           |
| Asymmetric dimethylarginine      | 0.0128 ± 0.000135            |
| Total dimethylarginine           | 0.0204 ± 0.000165            |
| Tryptophan                       | 0.0866 ± 0.000748            |
| Kynurenine                       | ND                           |
| Carnosine                        | ND                           |
| Nitro-Tyrosine                   | ND                           |
| Ornithine                        | 5.36 ± 0.225                 |
| Lysine                           | 4.28 ± 0.105                 |
| Spermidine                       | 0.0375 ± 0.000896            |
| Spermine                         | 0.0159 ± 0.000751            |

|                               |                    |
|-------------------------------|--------------------|
| Sarcosine                     | ND                 |
| Diacetylspermine              | ND                 |
| Tyramine                      | 0.00462 ± 0.000314 |
| Creatine                      | ND                 |
| Betaine                       | 0.0407 ± 0.000449  |
| Choline                       | 3.36 ± 0.0304      |
| Trimethylamine N-oxide        | ND                 |
| Methylhistidine               | ND                 |
| Proline-Betaine               | 0.0684 ± 0.00912   |
| Zeatin                        | ND                 |
| Homoserine                    | ND                 |
| Shikimic acid                 | 2.14 ± 0.0149      |
| Glyceric acid                 | 2.01 ± 0.0592      |
| beta-Hydroxybutyric acid      | 0.0362 ± 0.00105   |
| Lactic acid                   | ND                 |
| HPHPA                         | ND                 |
| Propionic acid                | 0.429 ± 0.0187     |
| 5-Hydroxyindoleacetic acid    | ND                 |
| para-Hydroxyphenylacetic acid | 0.00123 ± 0.000225 |
| Malic acid                    | 5.93 ± 0.0151      |
| Butyric acid                  | 0.134 ± 0.00421    |
| Hippuric acid                 | ND                 |
| Succinic acid                 | 0.416 ± 0.00152    |
| Glutaric acid                 | 0.241 ± 0.00405    |
| Methylmalonic acid            | ND                 |
| Fumaric acid                  | 0.122 ± 0.000146   |
| Valeric acid                  | 0.0392 ± 0.000746  |
| Benzoic acid                  | ND                 |
| Oxalic acid                   | 18.5 ± 0.135       |
| Indole acetic acid            | ND                 |
| Oxaloacetic acid              | ND                 |
| Salicylic acid                | ND                 |
| Citric acid                   | 12.5 ± 0.0147      |
| Absciscic acid                | ND                 |
| Aconitic acid                 | 0.0231 ± 0.000585  |
| Jasmonic acid                 | ND                 |
| Pyruvic acid                  | ND                 |
| alpha-Ketoglutaric acid       | 0.0572 ± 0.000303  |
| Hexose                        | 319 ± 10.1         |
| C0                            | 0.0434 ± 0.000538  |
| C2                            | ND                 |
| C3:1                          | ND                 |
| C3                            | ND                 |

|                |                        |
|----------------|------------------------|
| C4:1           | ND                     |
| C4             | ND                     |
| C3OH           | ND                     |
| C5:1           | ND                     |
| C5             | ND                     |
| C4OH           | ND                     |
| C6:1           | ND                     |
| C6             | ND                     |
| C5OH           | ND                     |
| C5:1DC         | ND                     |
| C5DC           | ND                     |
| C8             | ND                     |
| C5MDC          | ND                     |
| C9             | ND                     |
| C7DC           | ND                     |
| C10:2          | ND                     |
| C10:1          | ND                     |
| C10            | ND                     |
| C12:1          | ND                     |
| C12            | ND                     |
| C14:2          | ND                     |
| C14:1          | ND                     |
| C14            | ND                     |
| C12DC          | ND                     |
| C14:2OH        | ND                     |
| C14:1OH        | ND                     |
| C16:2          | ND                     |
| C16:1          | ND                     |
| C16            | ND                     |
| C16:2OH        | ND                     |
| C16:1OH        | ND                     |
| C16OH          | ND                     |
| C18:2          | ND                     |
| C18:1          | ND                     |
| C18            | ND                     |
| C18:1OH        | ND                     |
| LysoPC a C14:0 | $0.00674 \pm 0.000109$ |
| LysoPC a C16:1 | ND                     |
| LysoPC a C16:0 | $0.0313 \pm 0.000137$  |
| LysoPC a C17:0 | ND                     |
| LysoPC a C18:2 | $0.0354 \pm 0.000121$  |
| LysoPC a C18:1 | $0.0235 \pm 0.000337$  |
| LysoPC a C18:0 | $0.00319 \pm 0.000144$ |

|                |                      |
|----------------|----------------------|
| LysoPC a C20:4 | 0.00351 ± 0.000152   |
| LysoPC a C20:3 | 0.0302 ± 0.000228    |
| LysoPC a C24:0 | ND                   |
| LysoPC a C26:1 | ND                   |
| LysoPC a C26:0 | 0.00325 ± 0.000301   |
| LysoPC a C28:1 | 0.00608 ± 0.000109   |
| LysoPC a C28:0 | 0.00648 ± 0.000208   |
| PC aa C24:0    | 0.000686 ± 0.0000191 |
| PC aa C26:0    | 0.00789 ± 0.00134    |
| PC aa C28:1    | 0.000827 ± 0.000124  |
| PC ae C30:2    | ND                   |
| PC ae C30:1    | ND                   |
| PC ae C30:0    | 0.00276 ± 0.000876   |
| PC aa C30:2    | 0.000617 ± 0.000105  |
| PC aa C30:0    | 0.00171 ± 0.000648   |
| PC ae C32:2    | 0.000281 ± 0.000111  |
| PC ae C32:1    | ND                   |
| PC aa C32:3    | 0.000701 ± 0.000263  |
| PC aa C32:2    | ND                   |
| PC aa C32:1    | ND                   |
| PC aa C32:0    | ND                   |
| PC ae C34:3    | ND                   |
| PC ae C34:2    | ND                   |
| PC ae C34:1    | ND                   |
| PC ae C34:0    | ND                   |
| PC aa C34:4    | 0.00538 ± 0.000978   |
| PC aa C34:3    | 0.0464 ± 0.00394     |
| PC aa C34:2    | 0.101 ± 0.0652       |
| PC aa C34:1    | 0.0669 ± 0.00189     |
| PC ae C36:5    | ND                   |
| PC ae C36:4    | ND                   |
| PC ae C36:3    | 0.00376 ± 0.00153    |
| PC ae C36:2    | 0.00874 ± 0.00416    |
| PC ae C36:1    | 0.00839 ± 0.00119    |
| PC ae C36:0    | 0.00499 ± 0.0000128  |
| PC aa C36:6    | 0.0137 ± 0.0003397   |
| PC aa C36:5    | 0.0246 ± 0.00861     |
| PC aa C36:4    | 0.0643 ± 0.00977     |
| PC aa C36:3    | 0.0949 ± 0.0134      |
| PC aa C36:2    | 0.0585 ± 0.00989     |
| PC aa C36:1    | 0.0113 ± 0.00888     |
| PC aa C36:0    | 0.00348 ± 0.000157   |
| PC ae C38:6    | 0.00154 ± 0.00104    |

|             |                    |
|-------------|--------------------|
| PC ae C38:5 | 0.00104 ± 0.000593 |
| PC ae C38:4 | 0.00238 ± 0.000999 |
| PC ae C38:3 | 0.00509 ± 0.00167  |
| PC ae C38:2 | 0.00434 ± 0.00118  |
| PC ae C38:1 | 0.00216 ± 0.000784 |
| PC ae C38:0 | ND                 |
| PC aa C38:6 | 0.0160 ± 0.000146  |
| PC aa C38:5 | 0.0173 ± 0.00698   |
| PC aa C38:4 | 0.0187 ± 0.00886   |
| PC aa C38:3 | 0.00811 ± 0.00159  |
| PC aa C38:1 | 0.00173 ± 0.000666 |
| PC aa C38:0 | ND                 |
| PC ae C40:6 | ND                 |
| PC ae C40:5 | ND                 |
| PC ae C40:4 | ND                 |
| PC ae C40:3 | ND                 |
| PC ae C40:2 | ND                 |
| PC ae C40:1 | ND                 |
| PC aa C40:6 | ND                 |
| PC aa C40:5 | ND                 |
| PC aa C40:4 | ND                 |
| PC aa C40:3 | ND                 |
| PC aa C40:2 | ND                 |
| PC aa C40:1 | ND                 |
| PC ae C42:5 | ND                 |
| PC ae C42:4 | ND                 |
| PC ae C42:3 | ND                 |
| PC ae C42:2 | ND                 |
| PC ae C42:1 | ND                 |
| PC ae C42:0 | ND                 |
| PC aa C42:6 | ND                 |
| PC aa C42:5 | ND                 |
| PC aa C42:4 | ND                 |
| PC aa C42:2 | ND                 |
| PC aa C42:1 | ND                 |
| PC aa C42:0 | ND                 |
| PC ae C44:6 | ND                 |
| PC ae C44:5 | ND                 |
| PC ae C44:4 | ND                 |
| PC ae C44:3 | ND                 |

\*ND: Not Detected

and Quantified Plant Metabolite Concentrations in Different Samples

| Concentrations (μmol per gram) |                             |
|--------------------------------|-----------------------------|
| Canola Root Samples            | Commercial Cannabis Strains |
| ND                             | ND                          |
| $0.942 \pm 0.787$              | $1.44 \pm 0.579$            |
| $4.56 \pm 2.82$                | $4.27 \pm 0.867$            |
| $4.79 \pm 5.34$                | $4.59 \pm 1.07$             |
| $0.00636 \pm 0.0229$           | $0.00413 \pm 0.00246$       |
| $22.9 \pm 33.4$                | $8.91 \pm 7.81$             |
| $1.67 \pm 1.29$                | $2.99 \pm 1.23$             |
| $2.97 \pm 2.75$                | $1.77 \pm 0.457$            |
| $0.0216 \pm 0.0191$            | $0.00177 \pm 0.00202$       |
| $0.00906 \pm 0.00469$          | $0.0201 \pm 0.0126$         |
| $0.101 \pm 0.0897$             | $0.0126 \pm 0.00368$        |
| $0.0312 \pm 0.0327$            | $0.0256 \pm 0.00583$        |
| $1.14 \pm 0.897$               | $1.37 \pm 0.606$            |
| $0.745 \pm 0.678$              | $1.97 \pm 1.19$             |
| $3.04 \pm 4.02$                | $156 \pm 69.8$              |
| $2.79 \pm 4.58$                | $7.79 \pm 3.60$             |
| $14.6 \pm 12.9$                | $22.3 \pm 12.7$             |
| $8.31 \pm 6.05$                | $2.60 \pm 1.10$             |
| $0.143 \pm 0.201$              | $0.0703 \pm 0.0171$         |
| ND                             | ND                          |
| $0.371 \pm 0.343$              | $4.05 \pm 1.81$             |
| $0.478 \pm 0.484$              | $1.21 \pm 0.651$            |
| $0.491 \pm 0.411$              | $30.1 \pm 8.90$             |
| $0.122 \pm 0.158$              | $0.291 \pm 0.114$           |
| $0.0374 \pm 0.0846$            | $0.0958 \pm 0.0291$         |
| $0.276 \pm 0.187$              | $0.384 \pm 0.113$           |
| ND                             | ND                          |
| $0.0256 \pm 0.0274$            | $0.0159 \pm 0.0109$         |
| $0.0377 \pm 0.0370$            | $0.0351 \pm 0.00907$        |
| $0.188 \pm 0.225$              | $1.85 \pm 1.22$             |
| $0.00167 \pm 0.000986$         | $0.00407 \pm 0.00290$       |
| ND                             | ND                          |
| ND                             | ND                          |
| $0.0743 \pm 0.0792$            | $0.250 \pm 0.245$           |
| $0.569 \pm 0.562$              | $1.62 \pm 0.761$            |
| $0.0331 \pm 0.0402$            | $0.0216 \pm 0.0189$         |
| $0.00332 \pm 0.00478$          | $0.00390 \pm 0.00237$       |

|                       |                          |
|-----------------------|--------------------------|
| ND                    | ND                       |
| ND                    | ND                       |
| $0.721 \pm 1.14$      | $0.0996 \pm 0.0980$      |
| ND                    | $0.0210 \pm 0.00764$     |
| $0.651 \pm 0.458$     | $0.0992 \pm 0.0342$      |
| $3.60 \pm 2.44$       | $10.33 \pm 1.89$         |
| ND                    | $0.0407 \pm 0.00452$     |
| $0.0172 \pm 0.0125$   | $0.0263 \pm 0.0105$      |
| $0.417 \pm 0.0830$    | $0.133 \pm 0.108$        |
| $0.198 \pm 0.0712$    | $0.0958 \pm 0.0294$      |
| $0.0116 \pm 0.00525$  | ND                       |
| $0.609 \pm 1.03$      | $0.009001 \pm 0.00217$   |
| $0.627 \pm 0.741$     | $1.92 \pm 0.817$         |
| $0.115 \pm 0.381$     | $0.0690 \pm 0.0187$      |
| $4.45 \pm 7.09$       | $0.273 \pm 0.159$        |
| ND                    | $0.000733 \pm 0.0000194$ |
| $0.0979 \pm 0.0272$   | $0.207 \pm 0.106$        |
| ND                    | ND                       |
| $0.00516 \pm 0.00232$ | $0.0126 \pm 0.00397$     |
| $18.2 \pm 19.4$       | $3.98 \pm 1.97$          |
| $0.0568 \pm 0.0290$   | $0.222 \pm 0.123$        |
| $0.00633 \pm 0.00429$ | $0.00741 \pm 0.00526$    |
| $0.685 \pm 0.732$     | $0.324 \pm 0.103$        |
| $0.0440 \pm 0.0262$   | $0.324 \pm 0.178$        |
| $0.00341 \pm 0.00463$ | $0.00230 \pm 0.000524$   |
| $0.340 \pm 0.330$     | $0.217 \pm 0.214$        |
| $0.0157 \pm 0.00606$  | ND                       |
| $0.0194 \pm 0.0189$   | $0.497 \pm 0.228$        |
| $1.86 \pm 1.66$       | $3.18 \pm 6.28$          |
| $0.0168 \pm 0.00785$  | ND                       |
| ND                    | $0.120 \pm 0.0399$       |
| ND                    | $0.117 \pm 0.0517$       |
| $12.5 \pm 12.0$       | $30.3 \pm 16.8$          |
| ND                    | $0.00583 \pm 0.00378$    |
| $0.195 \pm 0.190$     | $3.10 \pm 2.34$          |
| ND                    | $0.0683 \pm 0.0349$      |
| $0.674 \pm 1.40$      | $0.0290 \pm 0.00598$     |
| $1.71 \pm 2.54$       | $0.0127 \pm 0.00750$     |
| $62.7 \pm 52.9$       | $45.9 \pm 47.8$          |
| $0.0104 \pm 0.00495$  | $0.0276 \pm 0.00934$     |
| ND                    | ND                       |
| ND                    | ND                       |
| ND                    | ND                       |

|                     |                    |
|---------------------|--------------------|
| ND                  | ND                 |
| 0.00671 ± 0.00184   | ND                 |
| 0.00804 ± 0.00292   | ND                 |
| 0.00911 ± 0.00369   | ND                 |
| ND                  | ND                 |
| 0.00863 ± 0.00111   | ND                 |
| ND                  | ND                 |
| ND                  | ND                 |
| 0.00547 ± 0.00102   | ND                 |
| ND                  | ND                 |
| 0.00264 ± 0.000374  | ND                 |
| ND                  | ND                 |
| 0.00361 ± 0.00351   | 0.0123 ± 0.00371   |
| ND                  | ND                 |
| 0.00444 ± 0.00408   | 0.0146 ± 0.00735   |
| 0.000978 ± 0.000768 | 0.00334 ± 0.000997 |
| ND                  | 0.0152 ± 0.00453   |



|                    |                    |
|--------------------|--------------------|
| ND                 | ND                 |
| 0.00115 ± 0.00154  | ND                 |
| ND                 | ND                 |
| 0.00202 ± 0.00200  | ND                 |
| ND                 | ND                 |
| 0.00250 ± 0.00197  | ND                 |
| ND                 | ND                 |
| 0.00392 ± 0.00341  | ND                 |
| 0.00496 ± 0.00431  | ND                 |
| 0.00176 ± 0.00122  | ND                 |
| ND                 | ND                 |
| 0.00289 ± 0.00223  | ND                 |
| 0.178 ± 0.191      | ND                 |
| 0.305 ± 0.302      | ND                 |
| 0.0524 ± 0.0494    | ND                 |
| ND                 | ND                 |
| 0.00221 ± 0.00166  | ND                 |
| 0.00454 ± 0.00367  | ND                 |
| 0.00517 ± 0.00370  | ND                 |
| 0.00185 ± 0.00109  | ND                 |
| ND                 | 0.00173 ± 0.000912 |
| 0.0655 ± 0.0792    | 0.00191 ± 0.000340 |
| 0.188 ± 0.203      | ND                 |
| 0.251 ± 0.266      | 0.0211 ± 0.00982   |
| 0.0677 ± 0.0618    | 0.0388 ± 0.0121    |
| 0.0290 ± 0.0205    | 0.0268 ± 0.00854   |
| 0.00463 ± 0.00336  | ND                 |
| 0.00106 ± 0.000738 | ND                 |
| 0.00139 ± 0.00108  | ND                 |

[illegible]

| Spruce & Pine Needles   |  |
|-------------------------|--|
| ND                      |  |
| $1.20 \pm 0.949$        |  |
| $0.817 \pm 0.304$       |  |
| $1.98 \pm 0.753$        |  |
| $0.00314 \pm 0.000846$  |  |
| $28.1 \pm 19.4$         |  |
| $0.420 \pm 0.0883$      |  |
| $0.800 \pm 0.191$       |  |
| $0.00401 \pm 0.00149$   |  |
| ND                      |  |
| $1.48 \pm 0.428$        |  |
| $0.0322 \pm 0.0449$     |  |
| $0.560 \pm 0.199$       |  |
| $0.351 \pm 0.241$       |  |
| $1.58 \pm 1.50$         |  |
| $6.64 \pm 3.78$         |  |
| $13.4 \pm 7.48$         |  |
| $12.8 \pm 4.58$         |  |
| $0.115 \pm 0.0725$      |  |
| $0.0219 \pm 0.00167$    |  |
| $1.02 \pm 0.798$        |  |
| $0.590 \pm 0.202$       |  |
| $65.0 \pm 45.1$         |  |
| $0.0122 \pm 0.00121$    |  |
| $0.0256 \pm 0.00987$    |  |
| $0.225 \pm 0.124$       |  |
| ND                      |  |
| $0.0134 \pm 0.00656$    |  |
| $0.0229 \pm 0.00135$    |  |
| $0.992 \pm 0.873$       |  |
| ND                      |  |
| ND                      |  |
| ND                      |  |
| $11.3 \pm 10.7$         |  |
| $18.6 \pm 18.1$         |  |
| $0.0277 \pm 0.00789$    |  |
| $0.00629 \pm 0.0000964$ |  |

|                        |
|------------------------|
| $0.0389 \pm 0.00452$   |
| ND                     |
| $0.00576 \pm 0.000684$ |
| $0.00591 \pm 0.00294$  |
| $0.0633 \pm 0.0446$    |
| $4.55 \pm 2.88$        |
| ND                     |
| $0.0206 \pm 0.00961$   |
| $0.0346 \pm 0.0123$    |
| $0.0108 \pm 0.00294$   |
| $0.0382 \pm 0.00516$   |
| $57.1 \pm 21.1$        |
| $0.713 \pm 0.284$      |
| $0.0801 \pm 0.0308$    |
| $0.277 \pm 0.189$      |
| ND                     |
| $0.0962 \pm 0.0351$    |
| ND                     |
| ND                     |
| $10.2 \pm 4.43$        |
| $0.0599 \pm 0.0271$    |
| $0.0108 \pm 0.00785$   |
| $0.348 \pm 0.262$      |
| $0.00597 \pm 0.00478$  |
| ND                     |
| $0.0371 \pm 0.0226$    |
| $0.0298 \pm 0.0109$    |
| $0.0659 \pm 0.0370$    |
| $24.0 \pm 15.4$        |
| ND                     |
| ND                     |
| $0.0763 \pm 0.0521$    |
| $3.79 \pm 2.93$        |
| ND                     |
| $0.0150 \pm 0.0131$    |
| ND                     |
| ND                     |
| $0.255 \pm 0.232$      |
| $379 \pm 101$          |
| $0.0228 \pm 0.0322$    |
| ND                     |
| ND                     |
| ND                     |

|                   |
|-------------------|
| ND                |
| 0.00448 ± 0.00160 |
| ND                |
| 0.0471 ± 0.0273   |
| 0.00257 ± 0.00209 |
| 0.0308 ± 0.0240   |
| 0.0175 ± 0.0163   |
| 0.00541 ± 0.00305 |

|                   |
|-------------------|
| ND                |
| 0.00319 ± 0.00174 |
| 0.00373 ± 0.00201 |
| 0.00203 ± 0.00172 |
| 0.0112 ± 0.00979  |
| 0.173 ± 0.0963    |
| 0.296 ± 0.139     |
| 0.145 ± 0.0681    |
| ND                |
| 0.00238 ± 0.00175 |
| 0.0136 ± 0.00866  |
| 0.0280 ± 0.0207   |
| 0.0198 ± 0.0164   |
| ND                |
| 0.0255 ± 0.0160   |
| 0.0849 ± 0.0457   |
| 0.170 ± 0.0826    |
| 0.269 ± 0.132     |
| 0.102 ± 0.0466    |
| 0.0274 ± 0.0120   |
| 0.00837 ± 0.00516 |
| 0.00276 ± 0.00245 |

[illegible]
