# Supplementary material for: A Comprehensive Targeted Metabolomics Assay for Crop Plant Sample Analysis
Source: MDPI journal article supplement (doi:10.3390/metabo11050303), 2021-05-11
Supplement: s1 [file s1]

| Supplementary Table S2. Optimized MRM Transitions and Mass Spectrometer Parameters |                  |       |     |    |     |
|------------------------------------------------------------------------------------|------------------|-------|-----|----|-----|
| Analyte                                                                            | MRM Optimization |       |     |    |     |
|                                                                                    | Q1               | Q3    | DP  | CE | CXP |
| Creatinine                                                                         | 114.1            | 44.1  | 60  | 17 | 15  |
| Glycine                                                                            | 211.2            | 75.9  | 66  | 14 | 15  |
| Alanine                                                                            | 225.2            | 44.2  | 61  | 35 | 15  |
| Serine                                                                             | 241.2            | 60    | 41  | 31 | 15  |
| Histamine                                                                          | 247              | 154   | 56  | 19 | 15  |
| Proline                                                                            | 251.2            | 70.3  | 51  | 43 | 15  |
| Valine                                                                             | 253.2            | 72.2  | 81  | 31 | 15  |
| Threonine                                                                          | 255.2            | 74.1  | 66  | 29 | 15  |
| Phenylethylamine                                                                   | 257.2            | 105.2 | 71  | 31 | 15  |
| Taurine                                                                            | 261              | 126.1 | 71  | 21 | 15  |
| Putrescine                                                                         | 266.1            | 113.9 | 100 | 25 | 15  |
| trans-Hydroxyproline                                                               | 267.15           | 68    | 56  | 61 | 15  |
| Leucine                                                                            | 267.3            | 43    | 55  | 66 | 15  |
| Isoleucine                                                                         | 267.3            | 69    | 55  | 45 | 15  |
| Asparagine                                                                         | 268.2            | 87    | 41  | 25 | 15  |
| Aspartic acid                                                                      | 269.2            | 116.2 | 76  | 21 | 15  |
| Glutamine                                                                          | 282.2            | 130   | 71  | 25 | 15  |
| Glutamic acid                                                                      | 283.2            | 130.2 | 76  | 23 | 15  |
| Methionine                                                                         | 285.1            | 104.2 | 71  | 25 | 15  |
| Dopamine                                                                           | 289.2            | 137.2 | 56  | 29 | 15  |
| Histidine                                                                          | 291.1            | 110.2 | 56  | 33 | 15  |
| Phenylalanine                                                                      | 301.2            | 120.2 | 71  | 31 | 15  |
| Arginine                                                                           | 310              | 217   | 76  | 23 | 15  |
| Citrulline                                                                         | 311.2            | 113.1 | 56  | 29 | 15  |
| Serotonin                                                                          | 312.3            | 160.2 | 66  | 27 | 15  |
| Tyrosine                                                                           | 317.2            | 136.1 | 76  | 31 | 15  |
| DOPA                                                                               | 333.1            | 198.1 | 61  | 19 | 15  |
| Asymmetric dimethylarginine                                                        | 338.2            | 46    | 71  | 61 | 15  |
| Total dimethylarginine                                                             | 338.2            | 70.1  | 71  | 61 | 15  |
| Tryptophan                                                                         | 340.2            | 188.2 | 96  | 25 | 15  |
| Kynurenine                                                                         | 344.2            | 146.2 | 46  | 33 | 15  |
| Carnosine                                                                          | 362.2            | 110.1 | 46  | 47 | 15  |
| Nitro-Tyrosine                                                                     | 362.2            | 136.1 | 65  | 41 | 15  |
| Ornithine                                                                          | 403.2            | 310.2 | 76  | 19 | 15  |
| Lysine                                                                             | 417.2            | 324.2 | 81  | 19 | 15  |
| Spermidine                                                                         | 551.2            | 193.2 | 71  | 41 | 15  |
| Spermine                                                                           | 743.3            | 193.2 | 56  | 61 | 15  |

|                               |       |       |      |     |     |
|-------------------------------|-------|-------|------|-----|-----|
| Sarcosine                     | 225.1 | 44.2  | 43   | 31  | 15  |
| Diacetylspermine              | 422.4 | 171.2 | 32   | 34  | 15  |
| Tyramine                      | 273.2 | 121.1 | 41   | 29  | 15  |
| Creatine                      | 132.1 | 90    | 40   | 18  | 15  |
| Betaine                       | 118.1 | 59.2  | 60   | 30  | 15  |
| Choline                       | 104.2 | 60.1  | 28   | 50  | 15  |
| Trimethylamine N-oxide        | 76    | 58    | 40   | 26  | 15  |
| Methylhistidine               | 305.1 | 212.1 | 46   | 23  | 15  |
| Proline-Betaine               | 114.1 | 84    | 41   | 31  | 15  |
| Zeatin                        | 220.1 | 136.1 | 71   | 27  | 10  |
| Homoserine                    | 255.1 | 120.1 | 51   | 19  | 8   |
| Shikimic acid                 | 308   | 290   | -67  | -20 | -6  |
| Glyceric acid                 | 239.9 | 136.9 | -60  | -25 | -9  |
| beta-Hydroxybutyric acid      | 238   | 193.8 | -58  | -21 | -6  |
| Lactic acid                   | 224   | 137   | -55  | -12 | -10 |
| HPHPA                         | 316.2 | 194.2 | -70  | -20 | -9  |
| Propionic acid                | 208   | 136.8 | -30  | -26 | -25 |
| 5-Hydroxyindoleacetic acid    | 325   | 132.1 | -84  | -30 | -5  |
| para-Hydroxyphenylacetic acid | 286   | 150   | -80  | -27 | -7  |
| Malic acid                    | 404.1 | 208   | -80  | -26 | -13 |
| Butyric acid                  | 221.9 | 136.8 | -68  | -30 | -5  |
| Hippuric acid                 | 313   | 136.9 | -65  | -26 | -11 |
| Succinic acid                 | 387.1 | 234   | -100 | -27 | -20 |
| Glutaric acid                 | 401.2 | 248   | -85  | -26 | -5  |
| Methylmalonic acid            | 387   | 177.9 | -85  | -28 | -9  |
| Fumaric acid                  | 385   | 234   | -78  | -20 | -9  |
| Valeric acid                  | 236   | 137.1 | -75  | -24 | -5  |
| Benzoic acid                  | 256   | 250   | -60  | -26 | -9  |
| Oxalic acid                   | 359.1 | 149.7 | -65  | -30 | -7  |
| Indole acetic acid            | 308.9 | 155.9 | -100 | -28 | -16 |
| Oxaloacetic acid              | 401.1 | 383.1 | -60  | -16 | -9  |
| Salicylic acid                | 272   | 117.9 | -65  | -46 | -7  |
| Citric acid                   | 596.3 | 221.9 | -92  | -50 | -16 |
| Abscisic acid                 | 398.1 | 244.1 | -80  | -24 | -13 |
| Aconitic acid                 | 578.1 | 424.7 | -75  | -22 | -11 |
| Jasmonic acid                 | 344.1 | 194.3 | -70  | -26 | -4  |
| Pyruvic acid                  | 357   | 136.8 | -80  | -33 | -5  |
| alpha-Ketoglutaric acid       | 550.1 | 232.7 | -104 | -36 | -24 |
| Hexose                        | 179   | 89    | -55  | -12 | -15 |
| C0                            | 162.1 | 85.1  | 61   | 27  | 15  |
| C2                            | 204.1 | 85.1  | 41   | 27  | 15  |
| C3:1                          | 216.1 | 85.1  | 49   | 27  | 15  |
| C3                            | 218.1 | 85.1  | 46   | 29  | 15  |

|                |       |      |    |    |    |
|----------------|-------|------|----|----|----|
| C4:1           | 230.1 | 85.1 | 52 | 29 | 15 |
| C4             | 232.2 | 85.1 | 46 | 29 | 15 |
| C3OH           | 234.1 | 85.1 | 53 | 30 | 15 |
| C5:1           | 244.2 | 85.1 | 55 | 31 | 15 |
| C5             | 246.2 | 85.1 | 46 | 29 | 15 |
| C4OH           | 248.1 | 85.1 | 55 | 32 | 15 |
| C6:1           | 258.1 | 85.1 | 57 | 33 | 15 |
| C6             | 260.2 | 85.1 | 56 | 27 | 15 |
| C5OH           | 262.2 | 85.1 | 58 | 33 | 15 |
| C5:1DC         | 274.1 | 85.1 | 60 | 35 | 15 |
| C5DC           | 276.2 | 85.1 | 61 | 35 | 15 |
| C8             | 288.2 | 85.1 | 66 | 33 | 15 |
| C5MDC          | 290.2 | 85.1 | 63 | 37 | 15 |
| C9             | 302.2 | 85.1 | 66 | 39 | 15 |
| C7DC           | 304.2 | 85.1 | 66 | 39 | 15 |
| C10:2          | 312.2 | 85.1 | 67 | 40 | 15 |
| C10:1          | 314.2 | 85.1 | 68 | 40 | 15 |
| C10            | 316.2 | 85.1 | 56 | 37 | 15 |
| C12:1          | 342.2 | 85.1 | 73 | 44 | 15 |
| C12            | 344.3 | 85.1 | 73 | 44 | 15 |
| C14:2          | 368.3 | 85.1 | 78 | 47 | 15 |
| C14:1          | 370.3 | 85.1 | 78 | 47 | 15 |
| C14            | 372.2 | 85.1 | 86 | 45 | 15 |
| C12DC          | 374.3 | 85.1 | 86 | 45 | 15 |
| C14:2OH        | 384.3 | 85.1 | 81 | 49 | 15 |
| C14:1OH        | 386.3 | 85.1 | 81 | 50 | 15 |
| C16:2          | 396.3 | 85.1 | 83 | 51 | 15 |
| C16:1          | 398.3 | 85.1 | 84 | 51 | 15 |
| C16            | 400.3 | 85.1 | 84 | 51 | 15 |
| C16:2OH        | 412.3 | 85.1 | 86 | 53 | 15 |
| C16:1OH        | 414.3 | 85.1 | 87 | 53 | 15 |
| C16OH          | 416.3 | 85.1 | 87 | 53 | 15 |
| C18:2          | 424.3 | 85.1 | 89 | 54 | 15 |
| C18:1          | 426.4 | 85.1 | 89 | 55 | 15 |
| C18            | 428.4 | 85.1 | 96 | 63 | 15 |
| C18:1OH        | 442.4 | 85.1 | 92 | 57 | 15 |
| LysoPC a C14:0 | 468.3 | 184  | 79 | 30 | 15 |
| LysoPC a C16:1 | 494.3 | 184  | 79 | 30 | 15 |
| LysoPC a C16:0 | 496.3 | 184  | 81 | 31 | 15 |
| LysoPC a C17:0 | 510.3 | 184  | 82 | 31 | 15 |
| LysoPC a C18:2 | 520.3 | 184  | 82 | 31 | 15 |
| LysoPC a C18:1 | 522.3 | 184  | 82 | 31 | 15 |
| LysoPC a C18:0 | 524.3 | 184  | 85 | 31 | 15 |

|                |       |     |     |    |    |
|----------------|-------|-----|-----|----|----|
| LysoPC a C20:4 | 544.3 | 184 | 85  | 31 | 15 |
| LysoPC a C20:3 | 546.3 | 184 | 87  | 31 | 15 |
| LysoPC a C24:0 | 608.4 | 184 | 96  | 33 | 15 |
| LysoPC a C26:1 | 634.4 | 184 | 98  | 33 | 15 |
| LysoPC a C26:0 | 636.5 | 184 | 101 | 34 | 15 |
| LysoPC a C28:1 | 662.5 | 184 | 125 | 53 | 15 |
| LysoPC a C28:0 | 664.5 | 184 | 105 | 35 | 15 |
| PC aa C24:0    | 622.4 | 184 | 98  | 33 | 15 |
| PC aa C26:0    | 650.5 | 184 | 103 | 35 | 15 |
| PC aa C28:1    | 676.5 | 184 | 106 | 35 | 15 |
| PC ae C30:2    | 688.5 | 184 | 108 | 36 | 15 |
| PC ae C30:1    | 690.5 | 184 | 109 | 36 | 15 |
| PC ae C30:0    | 692.6 | 184 | 111 | 37 | 15 |
| PC aa C30:2    | 702.5 | 184 | 111 | 37 | 15 |
| PC aa C30:0    | 706.5 | 184 | 114 | 37 | 15 |
| PC ae C32:2    | 716.6 | 184 | 114 | 37 | 15 |
| PC ae C32:1    | 718.6 | 184 | 115 | 38 | 15 |
| PC aa C32:3    | 728.5 | 184 | 117 | 38 | 15 |
| PC aa C32:2    | 730.5 | 184 | 117 | 38 | 15 |
| PC aa C32:1    | 732.6 | 184 | 118 | 39 | 15 |
| PC aa C32:0    | 734.6 | 184 | 119 | 39 | 15 |
| PC ae C34:3    | 742.6 | 184 | 120 | 39 | 15 |
| PC ae C34:2    | 744.6 | 184 | 120 | 39 | 15 |
| PC ae C34:1    | 746.6 | 184 | 121 | 39 | 15 |
| PC ae C34:0    | 748.6 | 184 | 122 | 40 | 15 |
| PC aa C34:4    | 754.5 | 184 | 122 | 40 | 15 |
| PC aa C34:3    | 756.6 | 184 | 123 | 40 | 15 |
| PC aa C34:2    | 758.6 | 184 | 123 | 40 | 15 |
| PC aa C34:1    | 760.6 | 184 | 125 | 41 | 15 |
| PC ae C36:5    | 766.6 | 184 | 125 | 41 | 15 |
| PC ae C36:4    | 768.6 | 184 | 126 | 41 | 15 |
| PC ae C36:3    | 770.6 | 184 | 126 | 41 | 15 |
| PC ae C36:2    | 772.6 | 184 | 127 | 41 | 15 |
| PC ae C36:1    | 774.6 | 184 | 127 | 41 | 15 |
| PC ae C36:0    | 776.7 | 184 | 128 | 42 | 15 |
| PC aa C36:6    | 778.5 | 184 | 128 | 42 | 15 |
| PC aa C36:5    | 780.6 | 184 | 128 | 42 | 15 |
| PC aa C36:4    | 782.6 | 184 | 129 | 42 | 15 |
| PC aa C36:3    | 784.6 | 184 | 130 | 42 | 15 |
| PC aa C36:2    | 786.6 | 184 | 130 | 42 | 15 |
| PC aa C36:1    | 788.6 | 184 | 131 | 43 | 15 |
| PC aa C36:0    | 790.6 | 184 | 131 | 43 | 15 |
| PC ae C38:6    | 792.6 | 184 | 132 | 43 | 15 |

|             |       |     |     |    |    |
|-------------|-------|-----|-----|----|----|
| PC ae C38:5 | 794.6 | 184 | 132 | 43 | 15 |
| PC ae C38:4 | 796.6 | 184 | 133 | 43 | 15 |
| PC ae C38:3 | 798.6 | 184 | 133 | 43 | 15 |
| PC ae C38:2 | 800.7 | 184 | 133 | 43 | 15 |
| PC ae C38:1 | 802.7 | 184 | 134 | 44 | 15 |
| PC ae C38:0 | 804.7 | 184 | 135 | 44 | 15 |
| PC aa C38:6 | 806.6 | 184 | 135 | 44 | 15 |
| PC aa C38:5 | 808.6 | 184 | 136 | 44 | 15 |
| PC aa C38:4 | 810.6 | 184 | 136 | 44 | 15 |
| PC aa C38:3 | 812.6 | 184 | 136 | 44 | 15 |
| PC aa C38:1 | 816.7 | 184 | 138 | 45 | 15 |
| PC aa C38:0 | 818.7 | 184 | 138 | 45 | 15 |
| PC ae C40:6 | 820.6 | 184 | 139 | 45 | 15 |
| PC ae C40:5 | 822.6 | 184 | 139 | 45 | 15 |
| PC ae C40:4 | 824.7 | 184 | 140 | 45 | 15 |
| PC ae C40:3 | 826.7 | 184 | 140 | 46 | 15 |
| PC ae C40:2 | 828.7 | 184 | 141 | 46 | 15 |
| PC ae C40:1 | 830.7 | 184 | 141 | 46 | 15 |
| PC aa C40:6 | 834.6 | 184 | 143 | 46 | 15 |
| PC aa C40:5 | 836.6 | 184 | 143 | 47 | 15 |
| PC aa C40:4 | 838.6 | 184 | 144 | 47 | 15 |
| PC aa C40:3 | 840.7 | 184 | 144 | 47 | 15 |
| PC aa C40:2 | 842.7 | 184 | 144 | 47 | 15 |
| PC aa C40:1 | 844.7 | 184 | 145 | 47 | 15 |
| PC ae C42:5 | 850.7 | 184 | 147 | 48 | 15 |
| PC ae C42:4 | 852.7 | 184 | 148 | 48 | 15 |
| PC ae C42:3 | 854.7 | 184 | 148 | 48 | 15 |
| PC ae C42:2 | 856.7 | 184 | 149 | 48 | 15 |
| PC ae C42:1 | 858.7 | 184 | 141 | 46 | 15 |
| PC ae C42:0 | 860.8 | 184 | 150 | 49 | 15 |
| PC aa C42:6 | 862.6 | 184 | 150 | 49 | 15 |
| PC aa C42:5 | 864.7 | 184 | 151 | 49 | 15 |
| PC aa C42:4 | 866.7 | 184 | 152 | 50 | 15 |
| PC aa C42:2 | 870.7 | 184 | 153 | 50 | 15 |
| PC aa C42:1 | 872.7 | 184 | 153 | 50 | 15 |
| PC aa C42:0 | 874.7 | 184 | 154 | 50 | 15 |
| PC ae C44:6 | 876.7 | 184 | 154 | 50 | 15 |
| PC ae C44:5 | 878.7 | 184 | 155 | 51 | 15 |
| PC ae C44:4 | 880.7 | 184 | 156 | 51 | 15 |
| PC ae C44:3 | 882.7 | 184 | 156 | 51 | 15 |
