# Supplementary material for: A Comprehensive Targeted Metabolomics Assay for Crop Plant Sample Analysis
Source: MDPI journal article supplement (doi:10.3390/metabo11050303), 2021-05-11
Supplement: s1 [file s1]

| Supplementary Table S1. Concentration of Standards at Different C |                     |      |      |      |      |      |
|-------------------------------------------------------------------|---------------------|------|------|------|------|------|
| Analyte                                                           | Concentration in µM |      |      |      |      |      |
|                                                                   | Cal1                | Cal2 | Cal3 | Cal4 | Cal5 | Cal6 |
| Creatinine                                                        | 10                  | 20   | 100  | 200  | 400  | 600  |
| Glycine                                                           | 25                  | 50   | 250  | 500  | 1000 | 1500 |
| Alanine                                                           | 20                  | 40   | 200  | 400  | 800  | 1200 |
| Serine                                                            | 5                   | 10   | 50   | 100  | 200  | 300  |
| Histamine                                                         | 1                   | 2    | 10   | 20   | 40   | 60   |
| Proline                                                           | 10                  | 20   | 100  | 200  | 400  | 600  |
| Valine                                                            | 10                  | 20   | 100  | 200  | 400  | 600  |
| Threonine                                                         | 5                   | 10   | 50   | 100  | 200  | 300  |
| Phenylethylamine                                                  | 0.1                 | 0.2  | 1    | 2    | 4    | 6    |
| Taurine                                                           | 2.5                 | 5    | 25   | 50   | 100  | 150  |
| Putrescine                                                        | 0.1                 | 0.2  | 1    | 2    | 4    | 6    |
| trans-Hydroxyproline                                              | 1                   | 2    | 10   | 20   | 40   | 60   |
| Leucine                                                           | 5                   | 10   | 50   | 100  | 200  | 300  |
| Isoleucine                                                        | 5                   | 10   | 50   | 100  | 200  | 300  |
| Asparagine                                                        | 5                   | 10   | 50   | 100  | 200  | 300  |
| Aspartic acid                                                     | 5                   | 10   | 50   | 100  | 200  | 300  |
| Glutamine                                                         | 20                  | 40   | 200  | 400  | 800  | 1200 |
| Glutamic acid                                                     | 10                  | 20   | 100  | 200  | 400  | 600  |
| Methionine                                                        | 5                   | 10   | 50   | 100  | 200  | 300  |
| Dopamine                                                          | 1                   | 2    | 10   | 20   | 40   | 60   |
| Histidine                                                         | 5                   | 10   | 50   | 100  | 200  | 300  |
| Phenylalanine                                                     | 5                   | 10   | 50   | 100  | 200  | 300  |
| Arginine                                                          | 5                   | 10   | 50   | 100  | 200  | 300  |
| Citrulline                                                        | 5                   | 10   | 50   | 100  | 200  | 300  |
| Serotonin                                                         | 0.1                 | 0.2  | 1    | 2    | 4    | 6    |
| Tyrosine                                                          | 5                   | 10   | 50   | 100  | 200  | 300  |
| DOPA                                                              | 0.5                 | 1    | 5    | 10   | 20   | 30   |
| Asymmetric dimethylarginine                                       | 0.25                | 0.5  | 2.5  | 5    | 10   | 15   |
| Total dimethylarginine                                            | 0.25                | 0.5  | 2.5  | 5    | 10   | 15   |
| Tryptophan                                                        | 5                   | 10   | 50   | 100  | 200  | 300  |
| Kynurenine                                                        | 1                   | 2    | 10   | 20   | 40   | 60   |
| Carnosine                                                         | 0.5                 | 1    | 5    | 10   | 20   | 30   |
| Nitro-Tyrosine                                                    | 1                   | 2    | 10   | 20   | 40   | 60   |
| Ornithine                                                         | 5                   | 10   | 50   | 100  | 200  | 300  |
| Lysine                                                            | 10                  | 20   | 100  | 200  | 400  | 600  |
| Spermidine                                                        | 0.25                | 0.5  | 2.5  | 5    | 10   | 15   |
| Spermine                                                          | 0.25                | 0.5  | 2.5  | 5    | 10   | 15   |

|                               |       |      |      |      |      |      |
|-------------------------------|-------|------|------|------|------|------|
| Sarcosine                     | 1     | 2    | 10   | 20   | 40   | 60   |
| Diacetylspermine              | 0.25  | 0.5  | 2.5  | 5    | 10   | 15   |
| Tyramine                      | 0.5   | 1    | 5    | 10   | 20   | 30   |
| Creatine                      | 2.5   | 5    | 25   | 50   | 100  | 150  |
| Betaine                       | 5     | 10   | 50   | 100  | 200  | 300  |
| Choline                       | 2.5   | 5    | 25   | 50   | 100  | 150  |
| Trimethylamine N-oxide        | 10    | 20   | 100  | 200  | 400  | 600  |
| Methylhistidine               | 1     | 2    | 10   | 20   | 40   | 60   |
| Proline-Betaine               | 20    | 40   | 200  | 400  | 800  | 1200 |
| Zeatin                        | 1.25  | 2.5  | 12.5 | 25   | 50   | 75   |
| Homoserine                    | 2.5   | 5    | 25   | 50   | 100  | 150  |
| Shikimic acid                 | 1.25  | 2.5  | 5    | 10   | 20   | 40   |
| Glyceric acid                 | 2.5   | 5    | 10   | 20   | 40   | 80   |
| beta-Hydroxybutyric acid      | 5     | 10   | 20   | 40   | 80   | 160  |
| Lactic acid                   | 50    | 100  | 200  | 400  | 800  | 1600 |
| HPHPA                         | 0.1   | 0.2  | 0.4  | 0.8  | 1.6  | 3.2  |
| Propionic acid                | 0.55  | 1.1  | 2.2  | 4.4  | 8.8  | 17.6 |
| 5-Hydroxyindoleacetic acid    | 0.02  | 0.04 | 0.08 | 0.16 | 0.32 | 0.64 |
| para-Hydroxyphenylacetic acid | 0.2   | 0.4  | 0.8  | 1.6  | 3.2  | 6.4  |
| Malic acid                    | 1.25  | 2.5  | 5    | 10   | 20   | 40   |
| Butyric acid                  | 0.2   | 0.4  | 0.8  | 1.6  | 3.2  | 6.4  |
| Hippuric acid                 | 0.5   | 1    | 2    | 4    | 8    | 16   |
| Succinic acid                 | 1     | 2    | 4    | 8    | 16   | 32   |
| Glutaric acid                 | 2.5   | 5    | 10   | 20   | 40   | 80   |
| Methylmalonic acid            | 0.05  | 0.1  | 0.2  | 0.4  | 0.8  | 1.6  |
| Fumaric acid                  | 0.5   | 1    | 2    | 4    | 8    | 16   |
| Valeric acid                  | 0.2   | 0.4  | 0.8  | 1.6  | 3.2  | 6.4  |
| Benzoic acid                  | 0.5   | 1    | 2    | 4    | 8    | 16   |
| Oxalic acid                   | 1.25  | 2.5  | 5    | 10   | 20   | 40   |
| Indole acetic acid            | 0.1   | 0.2  | 0.4  | 0.8  | 1.6  | 3.2  |
| Oxaloacetic acid              | 1.25  | 2.5  | 5    | 10   | 20   | 40   |
| Salicylic acid                | 1.25  | 2.5  | 5    | 10   | 20   | 40   |
| Citric acid                   | 5     | 10   | 20   | 40   | 80   | 160  |
| Absciscic acid                | 0.125 | 0.25 | 0.5  | 1    | 2    | 4    |
| Aconitic acid                 | 0.125 | 0.25 | 0.5  | 1    | 2    | 4    |
| Jasmonic acid                 | 0.125 | 0.25 | 0.5  | 1    | 2    | 4    |
| Pyruvic acid                  | 2.5   | 5    | 10   | 20   | 40   | 80   |
| alpha-Ketoglutaric acid       | 0.5   | 1    | 2    | 4    | 8    | 16   |

| alibration Levels |          |  |
|-------------------|----------|--|
|                   | Solvents |  |
| Cal7              |          |  |
| 800               | Water    |  |
| 2000              |          |  |
| 1600              |          |  |
| 400               |          |  |
| 80                |          |  |
| 800               |          |  |
| 800               |          |  |
| 400               |          |  |
| 8                 |          |  |
| 200               |          |  |
| 8                 |          |  |
| 80                |          |  |
| 400               |          |  |
| 400               |          |  |
| 400               |          |  |
| 400               |          |  |
| 1600              |          |  |
| 800               |          |  |
| 400               |          |  |
| 80                |          |  |
| 400               |          |  |
| 400               |          |  |
| 400               |          |  |
| 400               |          |  |
| 8                 |          |  |
| 400               |          |  |
| 40                |          |  |
| 20                |          |  |
| 20                |          |  |
| 400               |          |  |
| 80                |          |  |
| 40                |          |  |
| 80                |          |  |
| 400               |          |  |
| 800               |          |  |
| 20                |          |  |
| 20                |          |  |

|      |                      |
|------|----------------------|
| 80   |                      |
| 20   |                      |
| 40   |                      |
| 200  |                      |
| 400  |                      |
| 200  |                      |
| 800  |                      |
| 80   |                      |
| 1600 |                      |
| 100  |                      |
| 200  |                      |
| 100  |                      |
| 200  |                      |
| 400  | 75% aqueous methanol |
| 4000 |                      |
| 8    |                      |
| 44   |                      |
| 1.6  |                      |
| 16   |                      |
| 100  |                      |
| 16   |                      |
| 40   |                      |
| 80   |                      |
| 200  |                      |
| 4    |                      |
| 40   |                      |
| 16   |                      |
| 40   |                      |
| 100  |                      |
| 8    |                      |
| 100  |                      |
| 100  |                      |
| 400  |                      |
| 10   |                      |
| 10   |                      |
| 10   |                      |
| 200  |                      |
| 40   |                      |
