# Supplementary material for: A Comprehensive Targeted Metabolomics Assay for Crop Plant Sample Analysis
Source: MDPI journal article supplement (doi:10.3390/metabo11050303), 2021-05-11
Supplement: s1 [file s1]

**Supplementary Table S4. Intra- and Inter-day Accuracy and Precision**

| Analyte              | Low          |        |              |        | Medium       |        |              |        |
|----------------------|--------------|--------|--------------|--------|--------------|--------|--------------|--------|
|                      | Intra-day    |        | Inter-day    |        | Intra-day    |        | Inter-day    |        |
|                      | Accuracy (%) | CV (%) |
| Creatinine           | 100          | 3.72   | 101          | 2.90   | 105          | 4.46   | 99.4         | 2.08   |
| Glycine              | 105          | 2.52   | 98.0         | 4.23   | 95.7         | 2.43   | 103          | 1.33   |
| Alanine              | 101          | 2.56   | 96.0         | 1.74   | 101          | 0.991  | 98.8         | 2.46   |
| Serine               | 108          | 9.82   | 96.0         | 4.62   | 98.3         | 5.14   | 98.8         | 1.08   |
| Histamine            | 110          | 3.46   | 104          | 1.53   | 97.7         | 7.07   | 104          | 2.77   |
| Proline              | 112          | 1.63   | 96.7         | 4.36   | 98.6         | 2.69   | 101          | 0.148  |
| Valine               | 112          | 4.96   | 96.7         | 2.41   | 102          | 2.54   | 100          | 1.83   |
| Threonine            | 95.4         | 6.44   | 100          | 5.96   | 88.8         | 8.30   | 102          | 1.21   |
| Phenylethylamine     | 98.4         | 4.27   | 105          | 7.87   | 108          | 2.03   | 101          | 5.01   |
| Taurine              | 103          | 8.50   | 100          | 4.65   | 97.3         | 2.43   | 93.4         | 2.31   |
| Putrescine           | 101          | 9.53   | 94.9         | 6.15   | 106          | 5.10   | 95.7         | 6.23   |
| trans-Hydroxyproline | 101          | 8.97   | 101          | 5.33   | 101          | 7.74   | 99.1         | 1.13   |
| Leucine              | 103          | 4.74   | 99.7         | 2.50   | 91.5         | 3.16   | 98.6         | 1.70   |
| Isoleucine           | 104          | 1.27   | 114          | 0.154  | 98.5         | 1.46   | 102          | 2.67   |
| Asparagine           | 109          | 7.16   | 106          | 5.73   | 110          | 5.14   | 102          | 8.01   |
| Aspartic acid        | 96.3         | 6.97   | 93.6         | 3.54   | 105          | 9.25   | 94.2         | 8.93   |
| Glutamine            | 101          | 2.15   | 99.6         | 6.74   | 101          | 4.95   | 98.7         | 3.51   |
| Glutamic acid        | 106          | 6.44   | 93.7         | 9.10   | 103          | 10.5   | 101          | 11.9   |
| Methionine           | 107          | 3.63   | 96.3         | 4.85   | 104          | 3.32   | 99.4         | 1.14   |
| Dopamine             | 98.9         | 0.193  | 100          | 5.50   | 96.1         | 3.59   | 101          | 0.721  |
| Histidine            | 105          | 0.138  | 92.3         | 0.854  | 97.9         | 2.88   | 104          | 0.422  |
| Phenylalanine        | 109          | 1.17   | 98.0         | 3.73   | 92.1         | 3.48   | 100          | 0.330  |
| Arginine             | 107          | 4.19   | 96.3         | 4.44   | 104          | 2.63   | 99.5         | 1.02   |
| Citrulline           | 102          | 6.11   | 96.6         | 4.14   | 102          | 6.25   | 99.4         | 2.11   |

|                               |      |       |      |       |      |       |      |       |
|-------------------------------|------|-------|------|-------|------|-------|------|-------|
| Serotonin                     | 91.0 | 6.53  | 102  | 0.857 | 98.0 | 5.38  | 98.0 | 4.31  |
| Tyrosine                      | 104  | 3.53  | 90.2 | 1.78  | 98.5 | 4.68  | 93.3 | 4.54  |
| DOPA                          | 106  | 2.79  | 99.1 | 6.25  | 96.9 | 5.28  | 93.2 | 2.18  |
| Asymmetric dimethylarginine   | 94.0 | 6.13  | 101  | 1.65  | 105  | 3.23  | 92.0 | 1.28  |
| Total dimethylarginine        | 102  | 1.48  | 91.6 | 8.49  | 101  | 6.39  | 98.8 | 2.72  |
| Tryptophan                    | 110  | 0.91  | 99.0 | 3.16  | 100  | 1.65  | 98.8 | 1.53  |
| Kynurenine                    | 100  | 4.34  | 87.7 | 6.42  | 98.5 | 6.83  | 94.9 | 1.92  |
| Carnosine                     | 99.0 | 3.16  | 108  | 6.35  | 97.1 | 5.00  | 99.0 | 2.25  |
| Nitro-Tyrosine                | 103  | 9.49  | 106  | 6.62  | 99.2 | 1.01  | 107  | 5.88  |
| Ornithine                     | 111  | 3.04  | 97.1 | 3.71  | 97.5 | 5.13  | 98.7 | 2.46  |
| Lysine                        | 104  | 5.99  | 98.1 | 6.01  | 90.8 | 6.55  | 96.9 | 0.696 |
| Spermidine                    | 103  | 2.29  | 107  | 8.30  | 101  | 2.31  | 98.9 | 3.79  |
| Spermine                      | 106  | 6.06  | 111  | 8.00  | 99.5 | 4.73  | 96.9 | 8.76  |
| Sarcosine                     | 100  | 0.733 | 102  | 7.94  | 106  | 0.679 | 101  | 1.26  |
| Diacetylspermine              | 102  | 4.29  | 110  | 6.66  | 108  | 7.94  | 98.2 | 3.27  |
| Tyramine                      | 98.7 | 4.45  | 98.1 | 9.34  | 100  | 3.43  | 101  | 1.61  |
| Creatine                      | 98.3 | 4.32  | 99.4 | 4.09  | 105  | 2.78  | 98.2 | 0.878 |
| Betaine                       | 96.8 | 2.88  | 90.3 | 10.3  | 105  | 5.54  | 101  | 0.239 |
| Choline                       | 111  | 2.03  | 101  | 2.57  | 100  | 2.58  | 101  | 0.794 |
| Trimethylamine N-oxide        | 105  | 1.31  | 101  | 3.85  | 100  | 2.53  | 99.9 | 1.97  |
| Methylhistidine               | 102  | 1.16  | 94.2 | 8.54  | 97.9 | 2.48  | 100  | 1.02  |
| Proline-Betaine               | 108  | 3.79  | 107  | 4.14  | 105  | 3.19  | 93.9 | 3.21  |
| Zeatin                        | 110  | 4.09  | 108  | 2.09  | 98.4 | 3.95  | 107  | 6.42  |
| Homoserine                    | 97.8 | 4.83  | 99.9 | 5.22  | 90.1 | 7.53  | 98.1 | 4.17  |
| Shikimic acid                 | 95.7 | 1.68  | 97.0 | 2.09  | 96.0 | 0.833 | 92.0 | 2.30  |
| Glyceric acid                 | 99.4 | 2.26  | 96.1 | 2.09  | 101  | 0.685 | 99.3 | 1.63  |
| beta-Hydroxybutyric acid      | 100  | 1.22  | 99.2 | 2.42  | 103  | 1.47  | 103  | 0.896 |
| Lactic acid                   | 100  | 2.02  | 101  | 1.66  | 102  | 1.42  | 104  | 1.05  |
| HPHPA                         | 98.8 | 1.40  | 98.7 | 2.31  | 108  | 2.97  | 102  | 0.980 |
| Propionic acid                | 98.5 | 3.33  | 92.5 | 1.80  | 100  | 2.59  | 101  | 2.43  |
| 5-Hydroxyindoleacetic acid    | 108  | 1.60  | 91.9 | 7.72  | 104  | 0.278 | 91.2 | 2.53  |
| para-Hydroxyphenylacetic acid | 105  | 2.60  | 104  | 2.69  | 99.5 | 5.32  | 100  | 2.30  |

|                         |      |       |      |      |      |       |      |       |
|-------------------------|------|-------|------|------|------|-------|------|-------|
| Malic acid              | 97.0 | 3.23  | 99.9 | 1.33 | 102  | 2.08  | 103  | 0.900 |
| Butyric acid            | 102  | 4.42  | 101  | 6.68 | 107  | 4.86  | 101  | 1.43  |
| Hippuric acid           | 94.1 | 3.54  | 97.3 | 1.71 | 101  | 2.50  | 102  | 1.49  |
| Succinic acid           | 98.9 | 1.42  | 98.4 | 1.77 | 101  | 2.17  | 100  | 1.95  |
| Glutaric acid           | 93.5 | 3.75  | 98.6 | 3.41 | 103  | 2.55  | 105  | 2.53  |
| Methylmalonic acid      | 95.2 | 2.22  | 103  | 2.72 | 96.3 | 2.16  | 103  | 5.86  |
| Fumaric acid            | 98.9 | 6.18  | 96.5 | 3.45 | 102  | 2.17  | 104  | 1.42  |
| Valeric acid            | 97.1 | 6.84  | 97.7 | 2.07 | 111  | 2.93  | 91.0 | 5.41  |
| Benzoic acid            | 94.4 | 0.847 | 95.1 | 3.56 | 90.5 | 2.70  | 93.0 | 5.60  |
| Oxalic acid             | 89.7 | 4.16  | 103  | 3.28 | 96.0 | 1.44  | 106  | 3.41  |
| Indole acetic acid      | 97.5 | 6.54  | 95.2 | 7.69 | 103  | 5.96  | 90.3 | 7.09  |
| Oxaloacetic acid        | 96.1 | 1.57  | 93.3 | 2.74 | 105  | 3.45  | 97.6 | 3.57  |
| Salicylic acid          | 107  | 5.01  | 114  | 2.69 | 114  | 3.73  | 115  | 5.84  |
| Citric acid             | 93.3 | 5.71  | 94.1 | 4.68 | 96.1 | 2.50  | 101  | 2.46  |
| Abscisic acid           | 93.5 | 4.55  | 102  | 6.59 | 109  | 1.53  | 106  | 3.03  |
| Aconitic acid           | 93.5 | 4.55  | 112  | 4.55 | 109  | 1.53  | 117  | 1.37  |
| Jasmonic acid           | 83.7 | 4.02  | 98.7 | 5.64 | 88.8 | 1.56  | 99.7 | 3.24  |
| Pyruvic acid            | 104  | 3.16  | 104  | 2.73 | 108  | 0.369 | 112  | 1.64  |
| alpha-Ketoglutaric acid | 102  | 0.781 | 101  | 1.99 | 107  | 0.749 | 107  | 2.07  |

| High         |        |              |        |
|--------------|--------|--------------|--------|
| Intra-day    |        | Inter-day    |        |
| Accuracy (%) | CV (%) | Accuracy (%) | CV (%) |
| 101          | 4.61   | 101          | 3.01   |
| 96.3         | 3.90   | 97.5         | 3.25   |
| 105          | 1.28   | 97.9         | 5.14   |
| 96.6         | 0.856  | 96.7         | 4.91   |
| 93.6         | 5.12   | 102          | 3.72   |
| 96.9         | 2.07   | 101          | 2.44   |
| 94.2         | 4.24   | 97.2         | 5.90   |
| 88.3         | 3.94   | 96.8         | 3.37   |
| 103          | 2.35   | 98.9         | 4.68   |
| 96.7         | 9.90   | 97.8         | 6.96   |
| 96.3         | 4.73   | 98.0         | 8.34   |
| 98.1         | 4.55   | 99.0         | 4.73   |
| 87.2         | 1.64   | 95.8         | 5.35   |
| 94.8         | 5.99   | 93.7         | 9.67   |
| 91.7         | 5.52   | 96.8         | 8.23   |
| 95.8         | 0.753  | 91.8         | 12.7   |
| 97.4         | 7.45   | 96.8         | 3.76   |
| 93.8         | 10.2   | 92.6         | 10.6   |
| 101          | 4.35   | 98.0         | 4.19   |
| 103          | 4.08   | 101          | 0.649  |
| 96.0         | 4.88   | 98.9         | 3.98   |
| 91.5         | 2.40   | 98.4         | 3.36   |
| 98.9         | 5.93   | 96.9         | 5.10   |
| 103          | 4.14   | 97.5         | 6.27   |

|      |       |      |       |
|------|-------|------|-------|
| 100  | 4.34  | 101  | 5.28  |
| 91.7 | 3.77  | 95.2 | 9.01  |
| 93.0 | 0.845 | 94.5 | 1.64  |
| 103  | 2.45  | 92.5 | 1.70  |
| 106  | 5.33  | 98.6 | 3.25  |
| 94.3 | 3.95  | 97.1 | 3.99  |
| 87.6 | 3.15  | 93.8 | 6.46  |
| 92.5 | 8.28  | 94.8 | 5.07  |
| 90.9 | 3.17  | 94.8 | 3.24  |
| 98.2 | 2.34  | 92.0 | 9.88  |
| 97.7 | 0.402 | 91.8 | 9.03  |
| 98.1 | 3.37  | 95.9 | 5.15  |
| 100  | 3.75  | 99.9 | 8.66  |
| 106  | 5.52  | 99.5 | 4.93  |
| 95.2 | 7.02  | 94.1 | 1.98  |
| 95.2 | 4.87  | 101  | 3.12  |
| 104  | 1.93  | 100  | 3.46  |
| 100  | 5.06  | 101  | 2.65  |
| 103  | 2.42  | 101  | 1.95  |
| 97.2 | 1.83  | 100  | 3.61  |
| 94.8 | 3.24  | 98.1 | 3.68  |
| 96.1 | 2.44  | 96.3 | 6.55  |
| 92.0 | 5.86  | 102  | 5.80  |
| 96.3 | 9.00  | 91.2 | 2.69  |
| 101  | 2.65  | 98.4 | 0.704 |
| 105  | 2.02  | 101  | 0.977 |
| 101  | 0.990 | 99.7 | 0.301 |
| 97.6 | 0.271 | 101  | 1.54  |
| 104  | 3.38  | 99.5 | 3.30  |
| 102  | 5.09  | 100  | 0.838 |
| 96.1 | 5.82  | 99.0 | 1.66  |
| 95.8 | 1.45  | 97.5 | 2.77  |

|      |       |      |       |
|------|-------|------|-------|
| 104  | 0.223 | 102  | 2.67  |
| 104  | 2.07  | 98.6 | 2.07  |
| 101  | 1.31  | 99.5 | 0.506 |
| 102  | 2.21  | 99.5 | 0.870 |
| 101  | 7.14  | 94.5 | 5.78  |
| 101  | 8.09  | 95.6 | 5.04  |
| 103  | 3.42  | 102  | 0.564 |
| 95.0 | 2.59  | 93.9 | 1.77  |
| 92.0 | 2.07  | 94.9 | 1.32  |
| 112  | 1.44  | 111  | 1.45  |
| 108  | 3.75  | 100  | 4.25  |
| 105  | 5.41  | 102  | 1.97  |
| 106  | 4.34  | 113  | 3.02  |
| 101  | 0.990 | 102  | 1.49  |
| 101  | 6.51  | 95.3 | 2.56  |
| 101  | 6.51  | 111  | 2.39  |
| 92.8 | 3.37  | 93.1 | 4.41  |
| 99.4 | 2.12  | 97.1 | 1.37  |
| 102  | 2.32  | 98.5 | 2.41  |
